# Supplementary material for: Reductive-defect-suppressed titanium oxynitrides via Ca3N2-assisted topochemical nitridation
Source: Royal Society of Chemistry journal article supplement (doi:10.1039/d6sc00009f), 2026-04-07
Supplement: d6sc00009f1.pdf [file d6sc00009f1.pdf]

## Supporting information

### Defect-Suppressed Titanium Oxynitrides via Topochemical Nitridation using $\text{Ca}_3\text{N}_2$

Yuki Sasahara,<sup>+</sup> Kento Yoshii,<sup>+</sup> Daichi Kato, Issei Yamamoto, Yusuke Tsutsui, Kei Morisato, Hikaru Takeuchi, Tatsuya Tsumori, Hiroshi Takatsu, Satoshi Horike, Shu Seki, Kazuhiko Maeda, and Hiroshi Kageyama\*

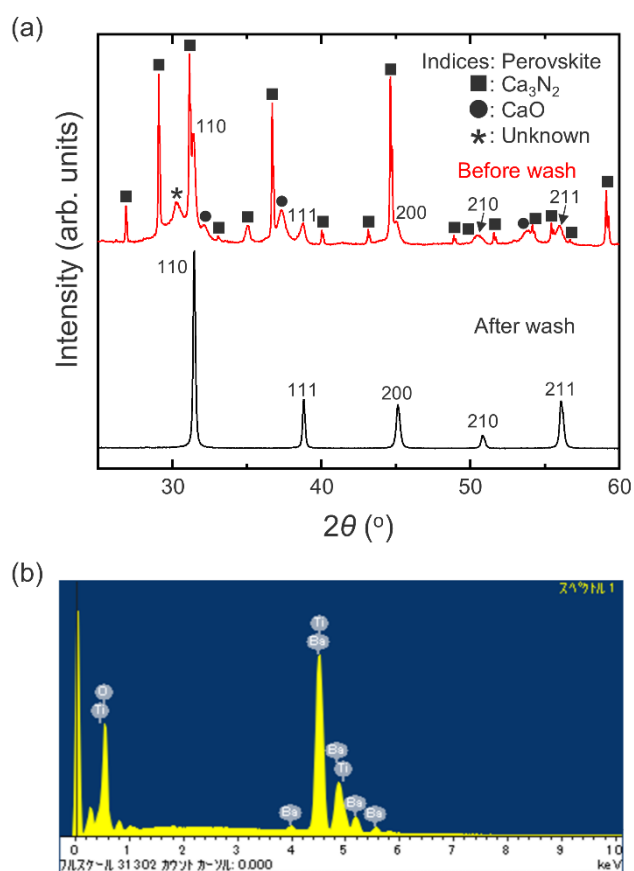

**Figure S1.** (a) Powder XRD patterns of  $\text{BaTiO}_{3-3x/2}\text{N}_x$  samples ( $\sim 100$  nm) reacted with  $\text{Ca}_3\text{N}_2$  at  $550$  °C for 2 weeks, before (red) and after washing (black). Extra peaks due to residual  $\text{Ca}_3\text{N}_2$ , CaO, and minor unknown phases disappear after washing, leaving only the perovskite reflections. (b) Elemental analysis of the washed sample using SEM-EDS. No Ca peak ( $\sim 3.69$  keV) was detected. The peak C is attributed to the carbon tape used to fix the powder.

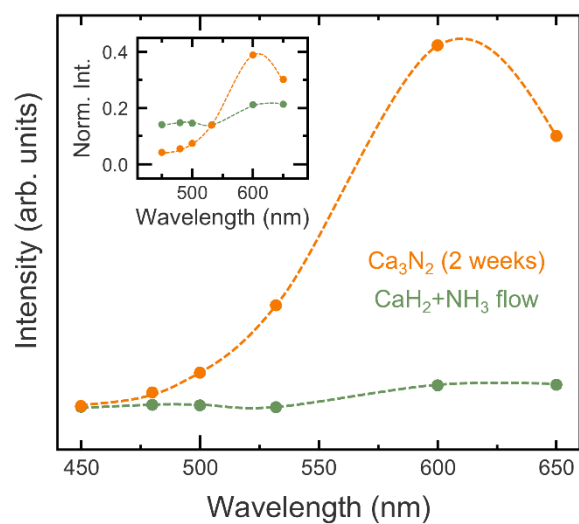

**Figure S2.** PL spectra of  $\text{BaTiO}_{3-3x/2}\text{N}_x$  measured at 6 K. The  $\text{Ca}_3\text{N}_2$ -treated sample (orange) exhibits a strong band-edge emission ( $\sim 2.0$  eV, 600 nm) with no discernible mid-gap emission, whereas the ammonolysis-derived sample (green) shows weak and broadened emission consistent with defect-induced nonradiative recombination. The inset shows normalized spectra highlighting the difference in spectral shape. Dashed lines are guides to the eye.

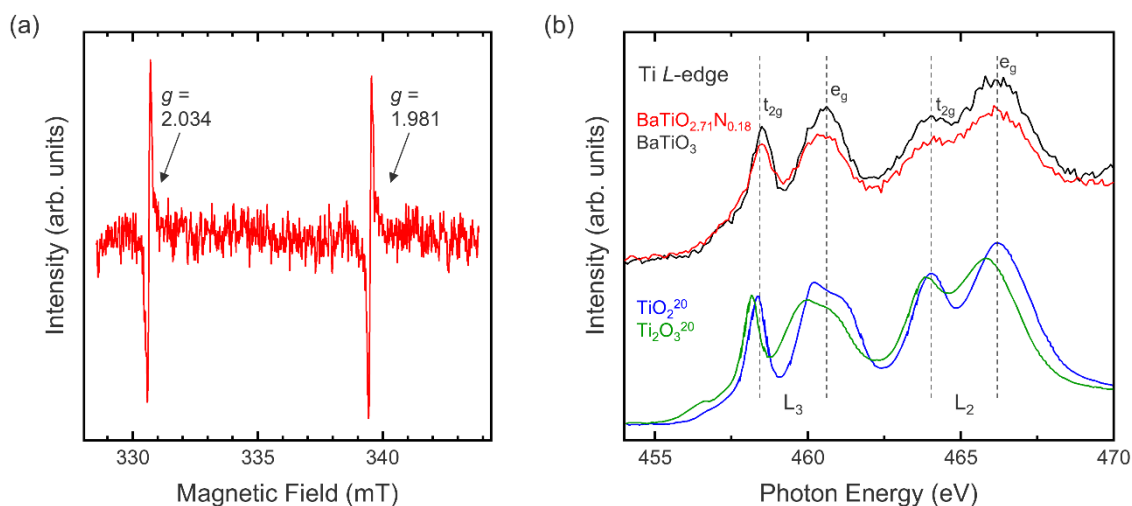

**Figure S3.** Spectroscopic assessment of the Ti valence state. (a) Electron paramagnetic resonance (EPR) spectrum of  $\text{Ca}_3\text{N}_2$ -derived  $\text{BaTiO}_{3-3x/2}\text{N}_x$  measured at room temperature. The sharp signals at  $g = 2.034$  and  $1.981$  arise from  $\text{Mn}^{2+}$  in the MgO (Mn/MgO) standard used for magnetic field calibration. No discernible signal attributable to  $\text{Ti}^{3+}$  was observed within the experimental sensitivity. (b) Ti L-edge soft X-ray absorption spectroscopy (XAS) spectra of the same specimen measured in partial fluorescence yield (PFY) mode, together with precursor  $\text{BaTiO}_3$  and reference compounds  $\text{TiO}_2$  ( $\text{Ti}^{4+}$ ) and  $\text{Ti}_2\text{O}_3$  ( $\text{Ti}^{3+}$ ). The spectra of  $\text{TiO}_2$  and  $\text{Ti}_2\text{O}_3$  were taken from Ref. 20. The peak positions of  $\text{BaTiO}_{3-3x/2}\text{N}_x$  closely overlap with those of  $\text{BaTiO}_3$  and  $\text{TiO}_2$ , with no resolvable contribution from  $\text{Ti}^{3+}$  detected within the detection limit.

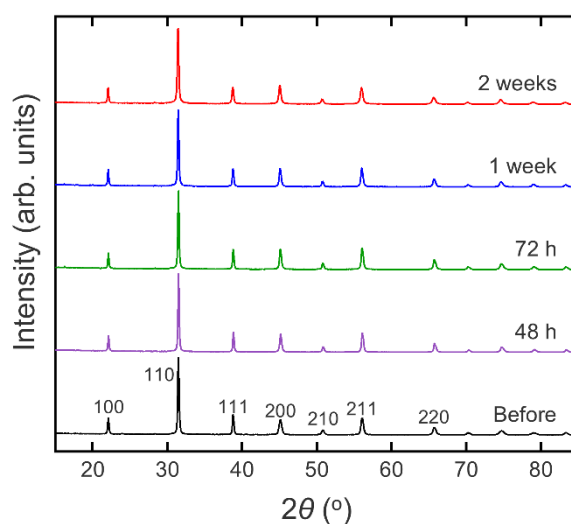

**Figure S4.** Powder XRD patterns of  $\text{BaTiO}_{3-3x/2}\text{N}_x$  samples ( $\sim 100$  nm) reacted with  $\text{Ca}_3\text{N}_2$  for different durations, followed by washing to remove residual  $\text{Ca}_3\text{N}_2$  and the CaO byproduct.

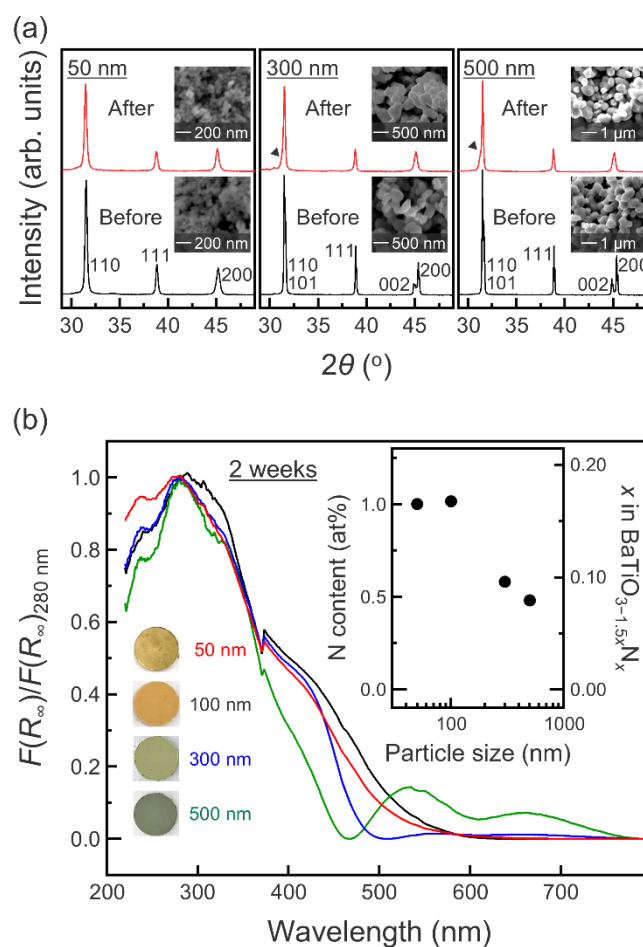

**Figure S5.** (a) Powder XRD patterns of  $\text{BaTiO}_{3-3x/2}\text{N}_x$  prepared from  $\text{BaTiO}_3$  precursors with different particle sizes ( $\sim 50$ , 300, 500 nm) after the reaction with  $\text{Ca}_3\text{N}_2$  for 2 weeks. The indexed reflections correspond to  $\text{BaTiO}_{3-3x/2}\text{N}_x$  (space group:  $Pm\bar{3}m$  for 50 nm,  $P4mm$  for 300 and 500 nm). The insets are SEM images of the respective samples. (b) Normalized UV-vis diffuse reflectance spectra of  $\text{BaTiO}_{3-3x/2}\text{N}_x$  reacted with  $\text{Ca}_3\text{N}_2$  for 2 weeks, as a function of the precursor particle size of precursor  $\text{BaTiO}_3$ . Insets (left) show photographs of the samples. Insets (right) summarize the nitrogen content as a function of precursor particle size.

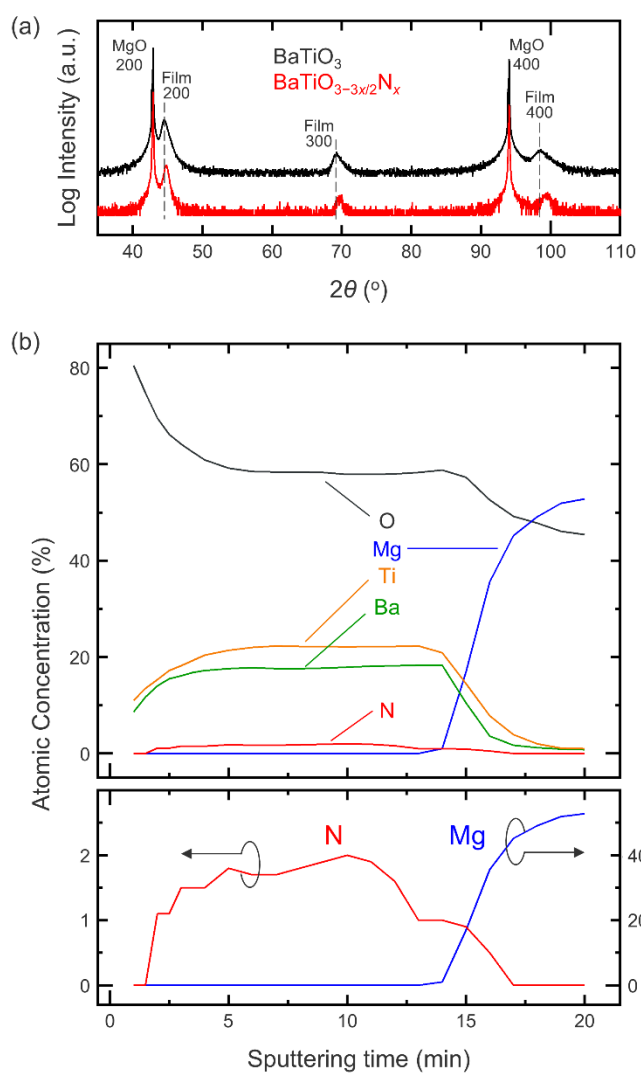

**Figure S6.** (a) Out-of-plane XRD patterns of BaTiO<sub>3</sub>/MgO(100) thin films as-deposited and after Ca<sub>3</sub>N<sub>2</sub> nitridation at 550 °C for 2 weeks. (b) XPS depth profiles of Ba, Ti, O, N, and Mg for the nitrated film shown in (a), obtained by sequential Ar<sup>+</sup> sputtering. The nitrogen signal is observed throughout the film thickness and decreases at the film/substrate interface, identified by the rise of the Mg signal from the MgO substrate.

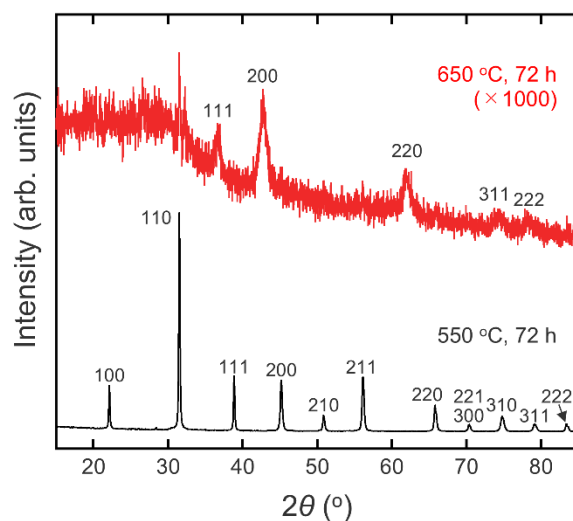

**Figure S7.** Powder XRD patterns of  $\text{BaTiO}_{3-3x/2}\text{N}_x$  samples ( $\sim 100$  nm) reacted with  $\text{Ca}_3\text{N}_2$  at 550 °C and 650 °C for 72 h, followed by washing to remove residual  $\text{Ca}_3\text{N}_2$  and the CaO byproduct. At 550 °C, sharp reflections are indexed to the perovskite phase ( $\text{BaTiO}_{3-3x/2}\text{N}_x$ ), whereas heating at 650 °C leads to further reaction, producing TiN, accompanied by broad, amorphous-like features.

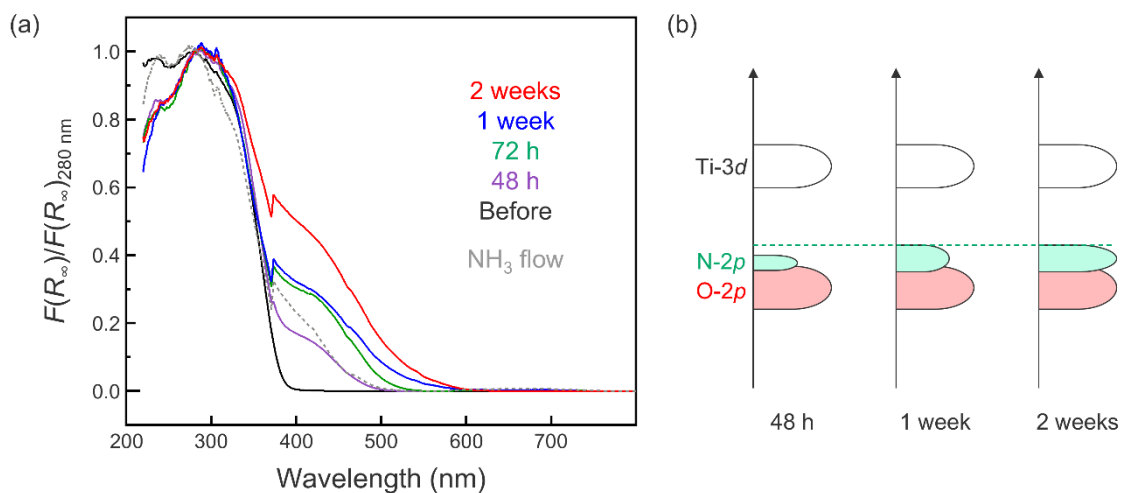

**Figure S8.** (a) Normalized UV-vis diffuse reflectance spectra of  $\text{BaTiO}_{3-3x/2}\text{N}_x$  ( $\sim 100$  nm) as a function of reaction time with  $\text{Ca}_3\text{N}_2$ , demonstrating progressive enhancement of visible-light absorption with prolonged reaction time. (b) Schematic illustration summarizing the evolution in the UV-vis absorption spectra shown in (a), based on the corresponding changes in the electronic structure near the band edge.

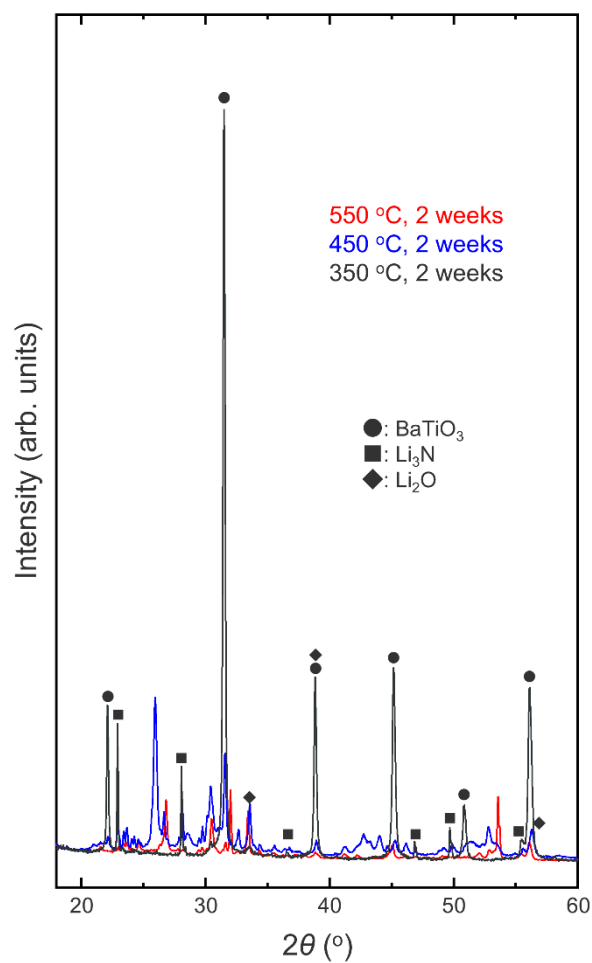

**Figure S9.** Powder XRD patterns of products obtained by reacting BaTiO<sub>3</sub> nanoparticles (~100 nm) with Li<sub>3</sub>N at 350, 450, and 550 °C for 2 weeks. The products were measured without washing. Upon treatment at ≥ 450 °C, a pronounced decrease in the intensity of BaTiO<sub>3</sub> reflections, indicating progressive decomposition of the perovskite phase. A similar trend is observed for the sample treated with Ca<sub>3</sub>N<sub>2</sub> at 650 °C (Fig. S7).

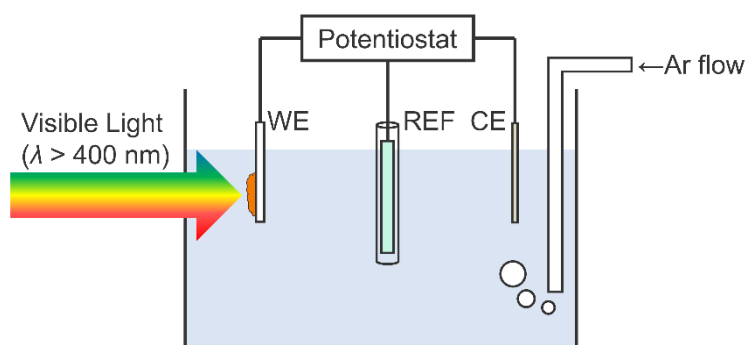

**Figure S10.** Schematic illustration of the three-electrode photoelectrochemical setup. A working electrode (WE), reference electrode (REF; Ag/AgCl), and counter electrode (CE; Pt wire) were connected to a potentiostat. Visible light ( $\lambda > 400$  nm) was irradiated onto the working electrode, and the electrolyte was deoxygenated by Ar flow.

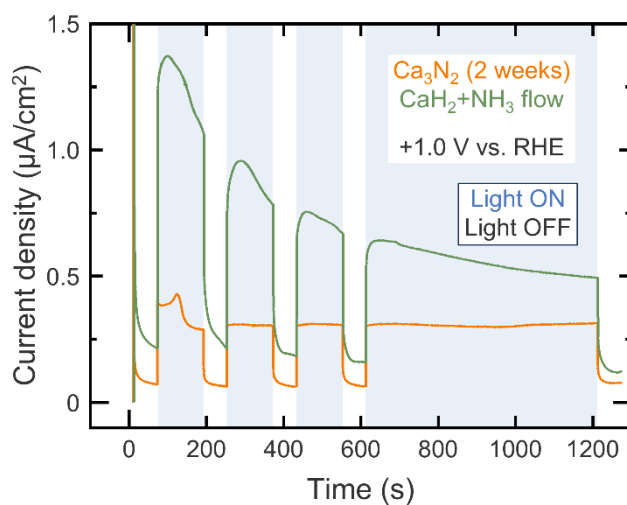

**Figure S11.** Transient photocurrent responses of  $\text{BaTiO}_{3-3x/2}\text{N}_x/\text{FTO}$  electrodes at +1.0 V vs. RHE in 0.1 M  $\text{Na}_2\text{SO}_4$  solution under visible-light irradiation ( $\lambda > 400$  nm). The oxyhydride-derived sample (green) shows a higher initial photocurrent but rapidly degrades under illumination due to defect-mediated self-oxidation, whereas the  $\text{Ca}_3\text{N}_2$ -treated sample (orange) exhibits a smaller but stable photocurrent.

**Table S1.** Lattice constant ( $a$ ), nitrogen content, and optical bandgap of  $\text{BaTiO}_{3-3x/2}\text{N}_x$  (~100 nm) as a function of reaction time with  $\text{Ca}_3\text{N}_2$  at 550 °C. These values were used to generate the plots in Fig. 2a. For reaction times up to 168 h, uncertainties in  $a$  represent the standard uncertainties obtained from Le Bail analysis of laboratory XRD data. For 2 weeks,  $a$  is reported as the mean value with standard deviation derived from 14 independently prepared samples, and the nitrogen content as the mean value with standard deviation from 4 independently prepared samples. Bandgaps were estimated from Tauc analyses of diffuse-reflectance spectra. In some cases, two indirect absorption edges (lower- and higher-energy transitions) are observed and both values are listed.

| Reaction time (h) | $a$ (Å)    | N content (at%) | $x$ in $\text{BaTiO}_{3-3x/2}\text{N}_x$ | Bandgap (eV) |
|-------------------|------------|-----------------|------------------------------------------|--------------|
| 0                 | 4.01433(6) | 0               | 0                                        | 3.14         |
| 6                 | 4.01037(7) | -               | -                                        | -            |
| 12                | 4.01001(7) | -               | -                                        | -            |
| 24                | 4.01080(7) | 0.11            | 0.02                                     | -            |
| 48                | 4.01098(5) | 0.10            | 0.02                                     | 2.40 / 3.00  |
| 72                | 4.01327(5) | 0.49            | 0.08                                     | 2.30 / 2.82  |
| 168 (1 week)      | 4.01557(5) | 0.70            | 0.12                                     | 2.07 / 2.73  |
| 336 (2 weeks)     | 4.0191(9)  | 1.03(12)        | 0.17(2)                                  | 2.03 / 2.26  |

**Table S2.** Melting points<sup>18,27</sup> of nitridation reagents and resulting lattice constants of BaTiO<sub>3-3x/2</sub>N<sub>x</sub> after reaction at 550 °C for 2 weeks. The lattice constant of BaTiO<sub>3</sub> heated under the same conditions is also shown as a control. For the sample reacted with Ca<sub>3</sub>N<sub>2</sub>,  $a$  is reported as the mean value with standard deviation from 14 independently prepared samples.

| Compounds                      | Melting point (°C) | Lattice constant (Å) |
|--------------------------------|--------------------|----------------------|
| Ca <sub>3</sub> N <sub>2</sub> | 1195               | 4.0191(9)            |
| VN                             | 2050               | 4.00902(8)           |
| ZrN                            | 2952               | 4.01029(15)          |
| None                           | -                  | 4.00803(11)          |
